# Supplementary material for: Pyridoxine 5′-phosphate oxidase is a novel therapeutic target and regulated by the TGF-β signalling pathway in epithelial ovarian cancer
Source: PubMed Central journal article supplement (PMC5870590; doi:10.1038/s41419-017-0050-3), 2017-12-13
Supplement: 41419_2017_50_MOESM4_ESM.pdf [file 41419_2017_50_MOESM4_ESM.pdf]

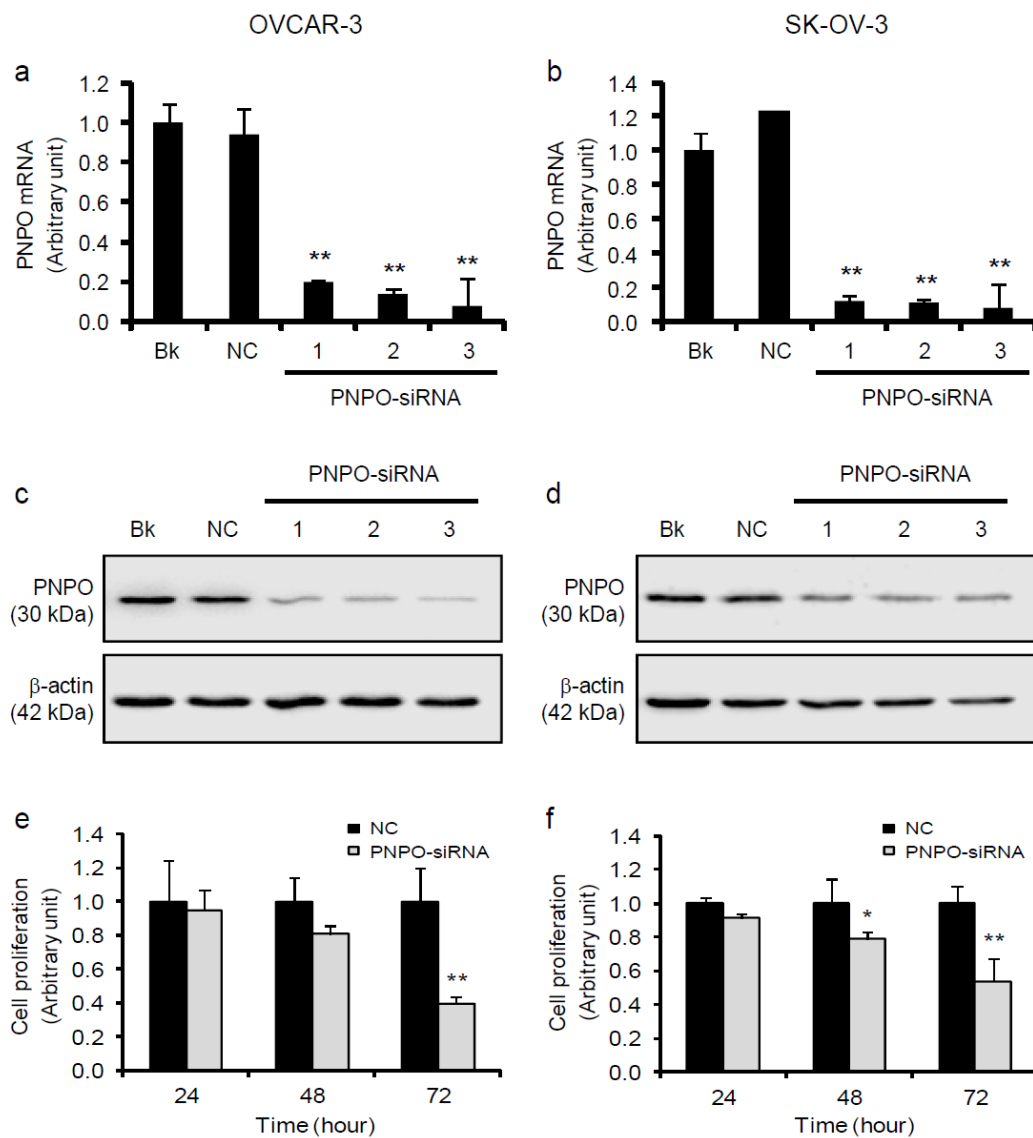

**Supplementary Figure S4** Effect of PNPO on cell proliferation. (a, c, e) OVCAR-3 and (b, d, f) SK-OV-3 cells were transiently transfected with PNPO-siRNA #1, #2, and #3, respectively, or negative control-siRNA (NC). Untreated cells were used as a blank control (Bk). (a, b) PNPO mRNA expression was measured after 24 h post-transfection. (c, d) PNPO protein expression was detected after 48 hours post-transfection. (e, f) Cell proliferation was detected by the WST-1 assay after 24, 48, and 72 h post-transfection of PNPO-siRNA #2. Data are presented as mean  $\pm$  SEM. \*,  $P < 0.05$ ; \*\*,  $P < 0.01$ ;  $n = 3$  independent experiments.
