# Supplementary material for: Pyridoxine 5′-phosphate oxidase is a novel therapeutic target and regulated by the TGF-β signalling pathway in epithelial ovarian cancer
Source: PubMed Central journal article supplement (PMC5870590; doi:10.1038/s41419-017-0050-3), 2017-12-13
Supplement: 41419_2017_50_MOESM8_ESM.pdf [file 41419_2017_50_MOESM8_ESM.pdf]

## Hendrix dataset

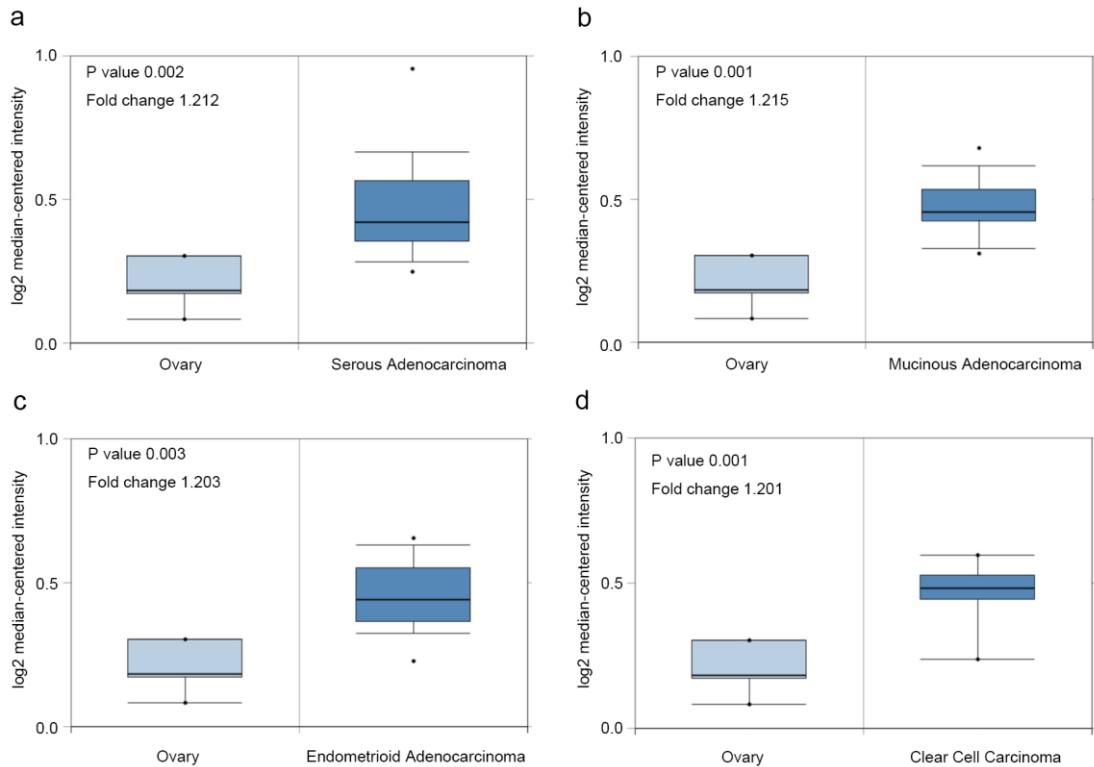

**Supplementary Figure S8** PNPO mRNA expression in ovarian tissues. Data were obtained from the microarray datasets of Hendrix in OncoPrint database ([www.oncoPrint.org](http://www.oncoPrint.org)). High level of PNPO mRNA expression was found in (a) serous adenocarcinoma (n=41), (b) mucinous adenocarcinoma (13), (c) endometrioid adenocarcinoma (n=37), and (d) clear cell carcinoma (n=8) compared with normal ovary (n=4).
