# Supplementary material for: Pyridoxine 5′-phosphate oxidase is a novel therapeutic target and regulated by the TGF-β signalling pathway in epithelial ovarian cancer
Source: PubMed Central journal article supplement (PMC5870590; doi:10.1038/s41419-017-0050-3), 2017-12-13
Supplement: 41419_2017_50_MOESM11_ESM.pdf [file 41419_2017_50_MOESM11_ESM.pdf]

**Supplementary Table S2** Sequences of siRNA, shRNA, miRNA, and primer

| Name                      | Sequence (5' → 3')                                              | Target position |
|---------------------------|-----------------------------------------------------------------|-----------------|
| <b>PNPO-siRNA</b>         |                                                                 |                 |
| Sense-1                   | GGAAAGAUGGCUUCCGCUUtt                                           | nt 461-479      |
| Antisense-1               | AAGCGGAAGCCAUCUUUCCtt                                           |                 |
| Sense-2                   | CCUUUGCUUCCCUUGUCUUtt                                           | nt 527-545      |
| Antisense-2               | AAGACAAGGGAAGCAAAGGtt                                           |                 |
| Sense-3                   | GGUGAUGGAGUUCUGGCAAtt                                           | nt 795-813      |
| Antisense-3               | UUGCCAGAACUCCAUCACCtt                                           |                 |
| <b>NC-siRNA</b>           |                                                                 |                 |
| Sense                     | UUCUCCGAACGUGUCACGUTT                                           | Scramble        |
| Antisense                 | ACGUGACACGUUCGGAGAATT                                           |                 |
| <b>PNPO-shRNA</b>         |                                                                 |                 |
| Sense                     | gatccGACTGGCTCTATGAGAGACTTCAAG<br>AGAGTCTCTCATAGAGCCAGTCTTTTTTg | nt 910-928      |
| Antisense                 | aattcAAAAAAGACTGGCTCTATGAGAGAC<br>TCTCTTGAAGTCTCTCATAGAGCCAGTCg |                 |
| <b>miRNA</b>              |                                                                 |                 |
| miR-143 mimic             | UGAGAUGAAGCACUGUAGCUC                                           | nt 2198-2206    |
| miR-Ctrl                  | UCACAACCUCCUAGAAAGAGUAGA                                        |                 |
| anti-miR-143              | GAGCUACAGUGCUUCAUCUCA                                           | nt 2198-2206    |
| anti-miR-Ctrl             | UCUACUCUUUCUAGGAGGUUGUGA                                        |                 |
| <b>PNPO 3'-UTR</b>        |                                                                 |                 |
| construct primer          |                                                                 |                 |
| Forward                   | gcgcccgcgatcgcgaattcGGGACCCACAGAATTA<br>CAGG                    | nt 2158-2177    |
| Reverse                   | ctgctcgaactagtctcgagCCCAGGCTGCATTCATA<br>TC                     | nt 2618-2636    |
| <b>PNPO PCR primer</b>    |                                                                 |                 |
| Forward                   | TTGAGGAGACTCATCTGACC                                            | nt 296-315      |
| Reverse                   | GTTAGTGAAGAAGCGGAAGC                                            | nt 470-489      |
| <b>β-actin PCR primer</b> |                                                                 |                 |
| Forward                   | ACAATGTGGCCGAGGACTTT                                            | nt 1412-1431    |
| Reverse                   | GCACGAAGGCTCATCATTCA                                            | nt 1654-1672    |
| <b>Pri-miR-143 primer</b> |                                                                 |                 |
| Forward                   | GAAGCAAGA ACTCTGGAGAAGC                                         | nt 346-367      |
| Reverse                   | GGACCTCTGTCTTCTGTTGG                                            | nt 444-463      |
| <b>miR-143 primer</b>     |                                                                 |                 |
| Forward                   | CTGAGATGAAGCACTGTAGCTC                                          |                 |
| Reverse                   | GTGCAGGGTCCGAGGT                                                |                 |
| <b>U6 primer</b>          |                                                                 |                 |
| Forward                   | CTCGCTTCGGCAGCACA                                               |                 |
| Reverse                   | AACGCTTCACGAATTTGCGT                                            |                 |
| <b>miR-143 RT primer</b>  |                                                                 |                 |
|                           | GTCGTATCCAGTGCAGGGTCCGAGGTATT<br>CGCACTGGATACGACgagcta          |                 |

The position in PNPO mRNA sequence (GenBank Accession: NM\_018129),  $\beta$ -actin mRNA sequence (GenBank Accession: NM\_001101), and Pri-miR-143 (GenBank Accession: NR\_105059) is shown. The low case indicates a linker. Underline indicates a site of restriction enzyme *EcoR* I or *Xho* I. NC, non-specific control; nt, nucleotide; PCR, polymerase chain reaction; shRNA, short hairpin RNA; siRNA, small interfering RNA.
